# Supplementary material
Source: publisher figshare collection journal article supplement (https://gsajournals.figshare.com/ndownloader/files/20720475)
Supplement: Supplementary file 1 [file 20720475]

## Sheet: slope-beta-tables3
Species	filtering*	#chromosomes	SNPs_used (failed in polarization)	b	CI_boots(95%)	p-value	R2	r2_boots(95%)	beta	S_d	p_b	S_b	pi0/pi4	Pi0	Pi4	mutation_rate(1e-9)	TD	rhoD
A. thaliana	10, 0, 0, 1, 100, 0.1	10	209836 (5.40%)	0.477	(0.435, 0.521)	3.60E-07	0.975	(0.938, 0.995)	0.3225751	-222.003	7.98E-06	0.0123487	0.233257195	0.0010212	0.004378	7	-0.380789691	20.09847
A. lyrata	10, 0, 0, 1, 100, 0.1	10	290964 (12.53%)	0.499	(0.585, 0.41)	4.02E-08	0.88	(0.765, 0.947)	0.3446372	-352.4657	1.95E-05	0.0787558	0.183629727	0.0019619	0.010684	7	-0.60281367	30.13018
C. rubella	10, 0, 0,30,100,0.5	10	101053 (0.87%)	0.43	(0.387, 0.466)	4.78E-11	0.953	(0.899,0.98)	0.3877494	-280.1572	0.05308512	0.000439121	0.244241748	0.0003722	0.0015239	7	-0.2754511054	15.75497946
C. grandiflora	10, 0, 0, 1, 100, 0.5	16	185372 (0.33%)	0.521	(0.359, 0.695)	1.20E-04	0.677	(0.457, 0.839)	0.3030656	-645.0785	0.0117206	10.58446	0.2	0.0012	0.006	7	-1.06321752	23.02078179
S. habrochaites	1e-20, 200, 0, 1, 100, 0.1	7	329695 (0.0063%)	0.205	(0.08, 0.319)	0.0207338	0.381	(0.0495, 0.69)	0.2311101	-98565.41	0.1430495	0.000428568	0.203418054	0.0006963	0.003423	5.2	0.2167223296	-5.36317782
S. huaylasense	1e-20, 200, 0, 1, 100, 0.1	4	104101 (0.10%)	0.536	(0.423, 0.656)	3.76E-06	0.79	(0.612, 0.9)	0.309072	-78719.78	0.1444625	0.005878293	0.175546448	0.00257	0.01464	5.2	-0.17066493	-8.586076586
S. propinquum	10, 0, 0, 1, 10, 0.1	7	129469 (0.52%)	0.374	(0.32, 0.426)	1.00E-08	0.904	(0.816, 0.959)	0.260165	-284.4627	2.93E-06	0.007746282	0.252857677	0.0006769	0.002677	10	-0.1039477886	60.03524
Z. mays	10, 0, 0, 1, 100, 1	10	179092 (29.3%)	0.292	(0.262, 0.319)	1.30E-10	0.942	(0.893, 0.972)	0.1848003	-2525.62	1.86E-05	0.004883847	0.331255083	0.002444	0.007378	30	-0.521557494	-0.38718011
P. trichocarpa	10, 0, 0, 1, 10, 0.1	16	575576 (0)	0.421	(0.277, 0.598)	1.56E-04	0.679	(0.43, 0.853)	0.2146055	-5353.714	0.03788233	0.9679363	0.220240157	0.000763	0.0034644	37.5	-0.4265129776	79.19642
D. melanogaster	10, 0, 0, 1, 10, 0.1	20	497276 (1.45%)	0.7	(0.62, 0.768)	1.26E-11	0.95	(0.909, 0.978)	0.41152	-2175.355	0.00831	99.45153	0.090948175	0.0011635	0.012793	2.8	-0.729042402	7.406745777
H. timareta	10, 0, 0, 1, 100, 0.1	8	190601 (0.1%)	0.435	(0.39, 0.476)	1.60E-09	0.914	(0.845, 0.961)	0.2103758	-94578.76	0.001163899	0.1059159	0.109142452	0.00154	0.01411	2.9	-0.099778948	6.583048719
*: for filtering we performed following criteria in order: e-value, bit-score, query coverage, query length, num of low quality sites, and percentage of low quality sites
different filtering criteria were chose for each species in order to maximize the linearity (R2 column) for slope calculation
